# Supplementary material for: Patterns of Brood Dispersal and Habitat Use in Emperor Goose (Anser canagicus) Goslings: Behavioral and Ecological Insights
Source: Research Square preprint supplement (doi:10.21203/rs.3.rs-7745177/v1), 2025-10-28
Supplement: Supplementary file 1 [file 150858e9a7ba25c5c0c72073.docx]

**SUPPLEMENTAL FIGURES**


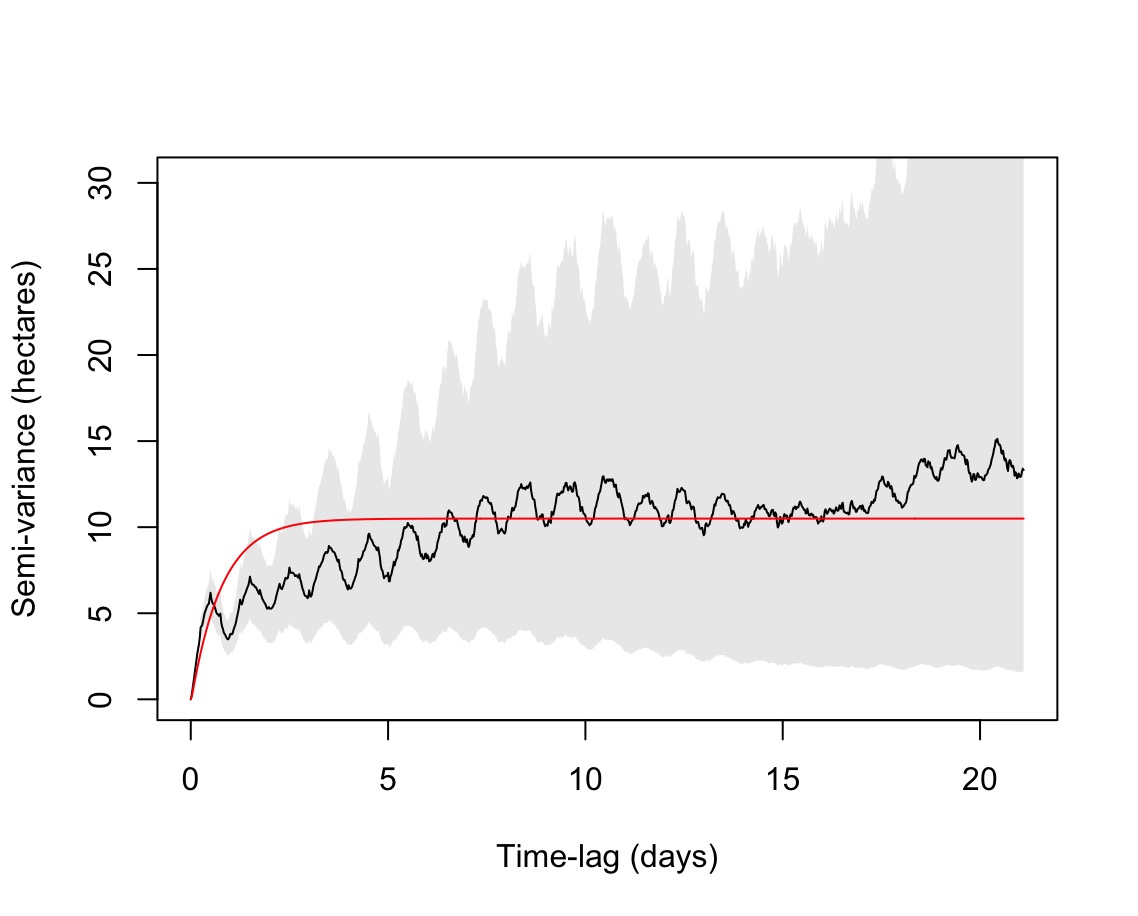


Supplemental Figure 1: **An example variogram from a range resident invidual (ID = ‘236517’).** The assymptote in red indicates the fitted model to the semi-variance in movement. The black line indicates the variance in movement of an individual between fixes. A better fit assymptote results in smaller confidence intervals in home range estimate.


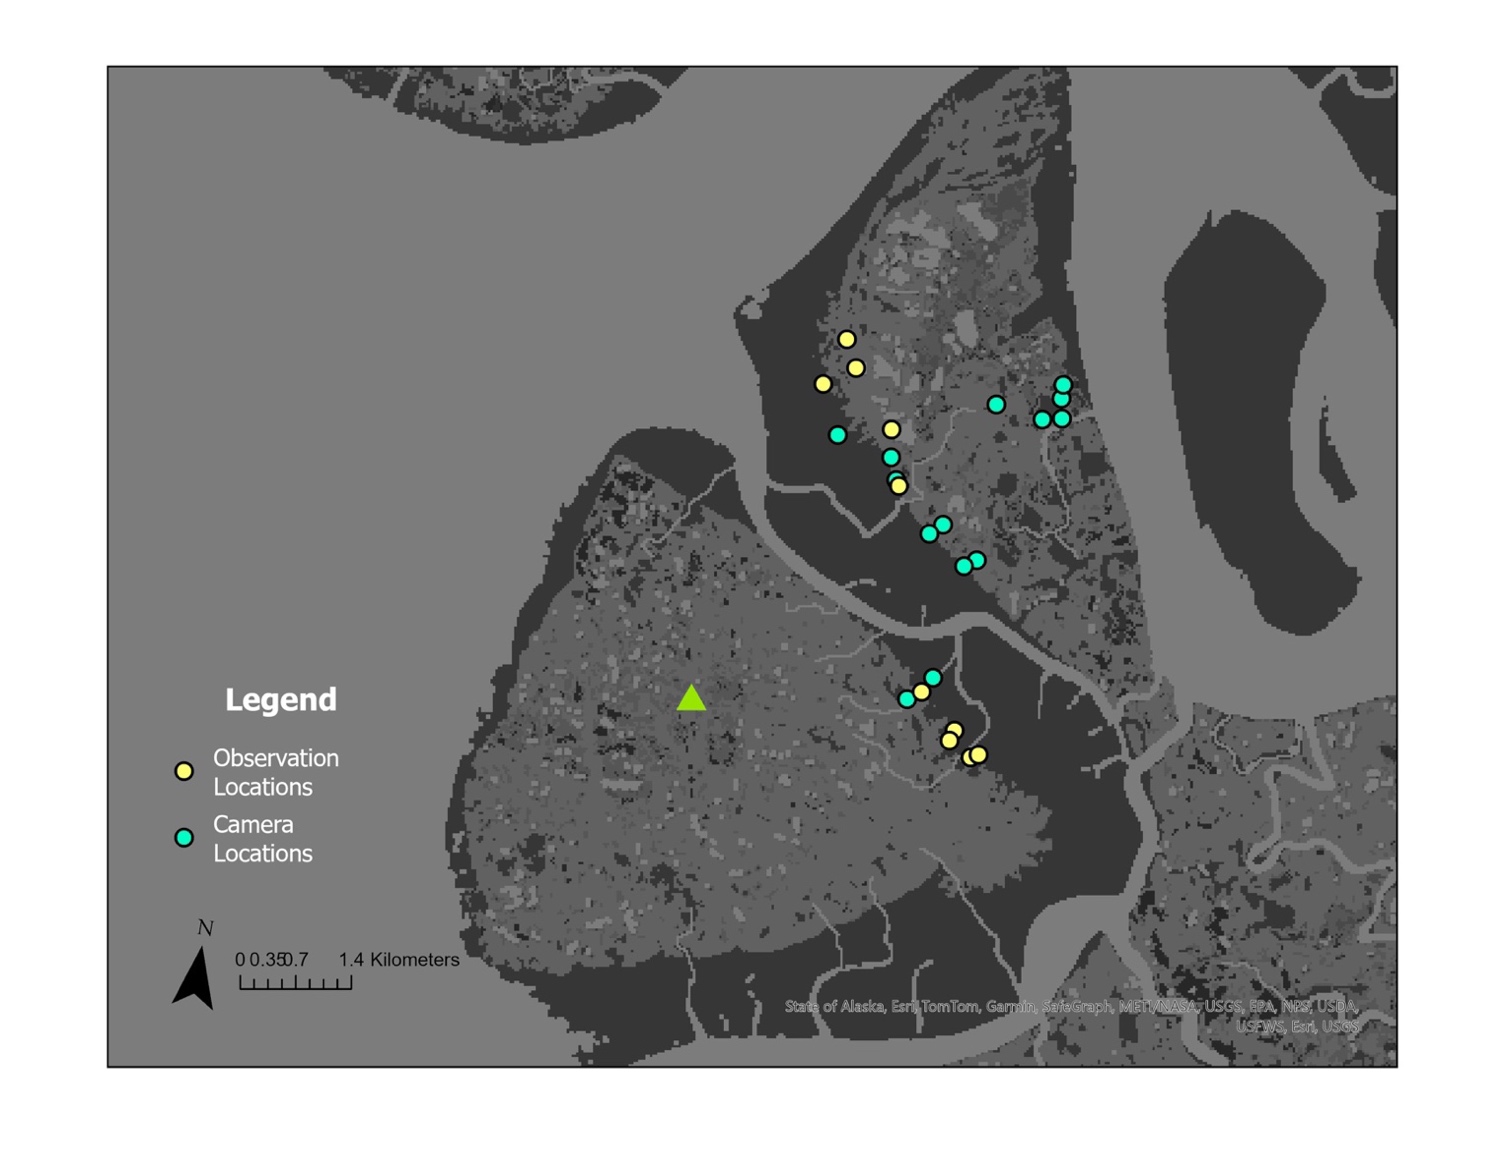


Supplemental Figure 2: **Map of camera locations and human observer locations for behavioral observations of emperor geese on mudflats and grazing lawns on Yukon-Kuskokwim Delta, Alaska 2023.** Location of field camp is designated by green triangle. Green dots indicate locations where game cameras were deployed. Yellow dots indicate where human observations occurred.

**SUPPLEMENTAL TABLES**

Supplemental Table I: **AICc values for competing models for our home range estimate**

|  | **ΔAICc** |  |
| --- | --- | --- |
| Inverse-Guassian | 0 |  |
| Dirac - δ | 159.8286 |  |
|  | **Area** | **95% CI** |
| **Mean (km2)** | 9.7595740 | 5.5379850 - 15.884614 |
| **CoV2 (rvar)** | 0.8436018 | 0.2225721 - 1.870719 |

Supplemental Table II: **Ethogram used to delineate behaviors exhibited by emperor goose broods and adults**. Other information recorded during the observational period included tidal information, conspecifics present, weather metrics (wind, precipitation, temperature), family group size, coordinates, and time at start/end.

| Behavior | Code | Definition | Behavior Type |
| --- | --- | --- | --- |
| *Alert* | A | Head up, scanning horizon for predators, active | Alert |
| *Head Up* | Hu | At rest, just normal head up vs alert | Resting |
| *Resting* | Re | Still or sitting, eyes closed/sleeping, not alert, head tucked | Resting |
| *Brooding* | Br | Goslings gathered beneath goose | Resting |
| *Preening* | P | Reaching around and reorganizing feathers using bill | Resting |
| *Head down (mud)* | Dm | Eating/drinking/gritting, foraging in mud | Foraging |
| *Head down (grass)* | Dg | Eating/drinking/gritting, foraging in grass | Foraging |
| *Head down (water)* | Dw | Eating/drinking/gritting, foraging in water | Foraging |
| *Interacting* | In | Interspecific or intraspecific communication between individuals, positive or negative | Interacting |
| *Fleeing* | Fl | Running away from predators/people | Traveling |
| *Flying* | Fly | Flying/traveling | Traveling |
| *Swimming* | Sw | Floating and moving through water | Traveling |
| *Walking* | Wa | Walking across substrate | Traveling |
| *Running* | Ru | Running across substrate | Traveling |
| *Calling* | C | Open mouthed vocalizations, head up, peeping/honking to communicate to others | Not Observed |
| *Bathing* | Ba | Fluffing feathers in water | Not Observed |
| *Tip Up* | Tu | Head down butt up | Not Observed |
| *Other* | O | Any behavior not described | Not Observed |

Supplemental Table III: **Odds-Ratio and associated confidence intervals for *our global model* resource selection function for 13 brood-rearing emperor geese on the Yukon Kuskokwim Delta, Alaska 2022-2023.**

|  | **Estimate** | **2.5%** | **97.5%** |
| --- | --- | --- | --- |
| Distance to Water | 0.87 | 0.83 | 0.92 |
| Mudflat | 0. 08 | 0. 07 | 0.09 |
| Tidal Sedge | 1.56 | 1. 43 | 1. 72 |
| Tundra | 0. 76 | 0. 57 | 1.01 |
